# Supplementary material
Source: MDPI journal article supplement (https://www.mdpi.com/2304-6740/7/5/56)
Supplement: s1 [file s1]

# Supplementary Materials: Green Synthesis of a Functionalized Zirconium-Based Metal–Organic Framework for Water and Ethanol Adsorption

Zhijie Chen, Xingjie Wang, Timur Islamoglu and Omar K. Farha

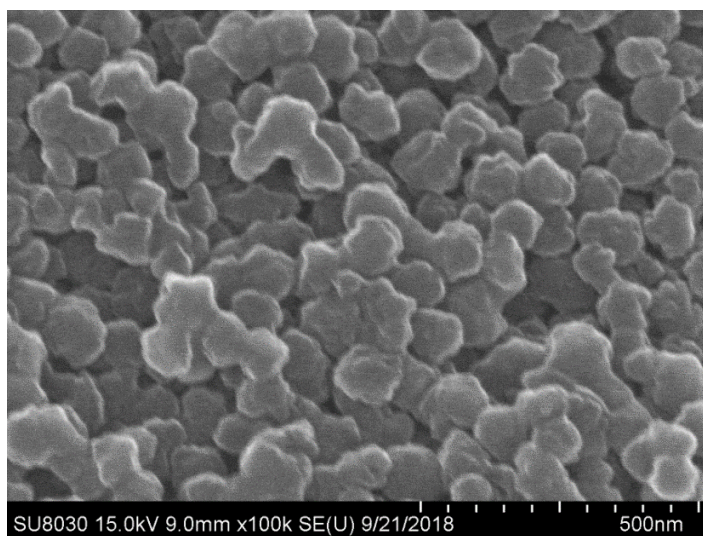

Figure S1. A SEM image of UiO-66-NO<sub>2</sub>.

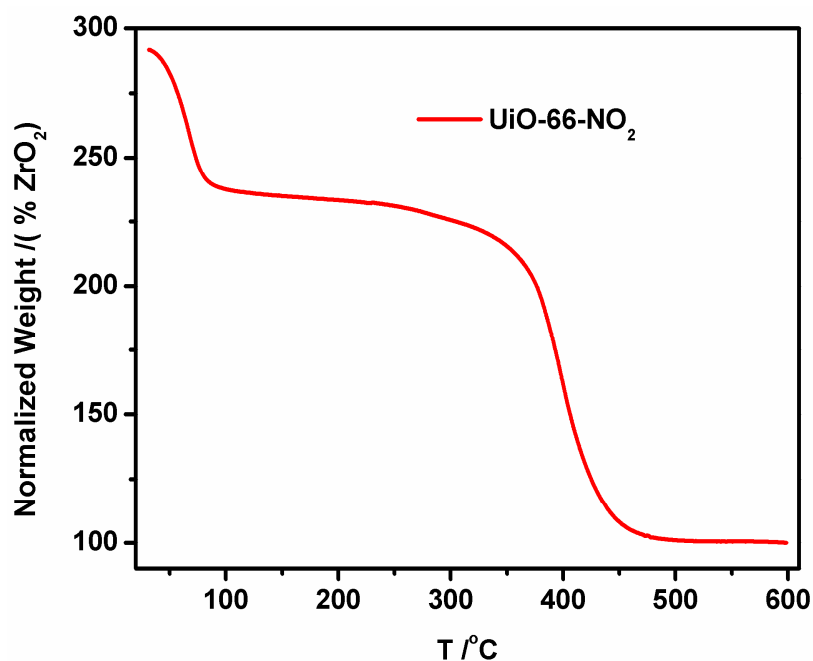

Figure S2. TGA plot of UiO-66-NO<sub>2</sub> under air flow based on the normalization of ZrO<sub>2</sub> to 100%. The defect amount is estimated based on the normalized weight at 350 °C.

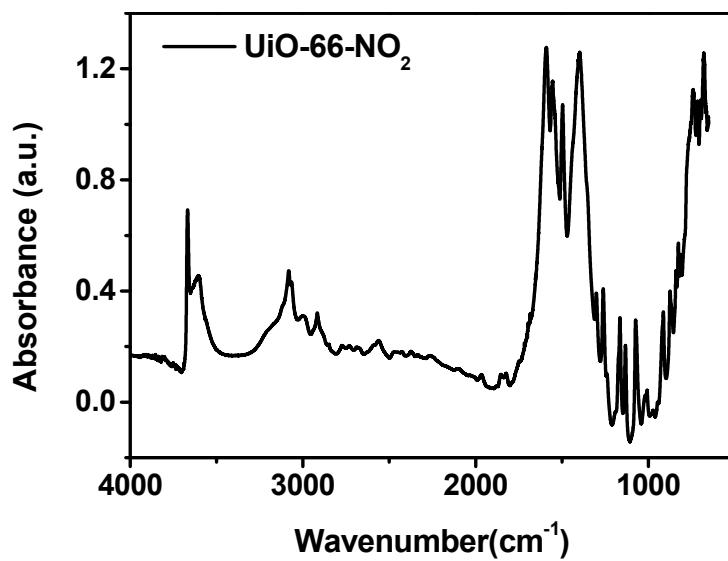

Figure S3. DRIFTS spectrum of UiO-66-NO<sub>2</sub>.
